# Supplementary material for: Genomics and resequencing of Fagopyrum dibotrys from different geographic regions reveals species evolution and genetic diversity
Source: Front Plant Sci. 2024 Jun 11;15:1380157. doi: 10.3389/fpls.2024.1380157 (PMC11196786; doi:10.3389/fpls.2024.1380157)
Supplement: Supplementary file 3 [file Table_1.xlsx]

## Sheet: Table S1
Sampling Location
Sample name	Sampling position
Whole-genome sequencing	Xiaoshao Village, Dabanqiao Town, Guandu District, Yunnan Province, 25°11′8.2176″ N, 102°58′54.7032″ E, 1982 meters
4B	Jijie Township, Haiqiao Checkpoint, Xundian County, Kunming City, Yunnan Province
5B	Jiulong Township, Luquan County, Kunming City, Yunnan Province
6-3A	Yinma Pool Village, Yangzong Township, Yuxi City, Yunnan Province
6-1B	Yinma Pool Village, Yangzong Township, Yuxi City, Yunnan Province
6-2B	Yinma Pool Village, Yangzong Township, Yuxi City, Yunnan Province
7A	Liángwángshān, Hailiang, Yangzong Township, Kunming City, Yunnan Province
8B	Baihan Field Community, Xiaoshao, Kunming City, Yunnan Province
10A	Baishui Village, Zhanyi County, Qujing City, Yunnan Province
11B	Baishui Village, Zhanyi County, Qujing City, Yunnan Province(Seed propagation)
15B	Bailaxiao Temple, Luoping County, Qujing City, Yunnan Province
16B	Nimudi, Dongshan Town, Xuanwei City, Qujing City, Yunnan Province
17B	Lizikou, Banzhuang, Zhujie Subdistrict Office, Zhujie Township, Qujing City, Yunnan Province
18-1B	Da Yao County, Chuxiong Prefecture, Yunnan Province
18-2B	Da Yao County, Chuxiong Prefecture, Yunnan Province
18-3B	Da Yao County, Chuxiong Prefecture, Yunnan Province
19-1B	Yongchun Township, Weixi County, Deqen Tibetan Autonomous Prefecture, Yunnan Province
19-2B	Yongchun Township, Weixi County, Deqen Tibetan Autonomous Prefecture, Yunnan Province
20-1B	Pantian Ge Township, Weixi County, Deqen Tibetan Autonomous Prefecture, Yunnan Province
20-2B	Pantian Ge Township, Weixi County, Deqen Tibetan Autonomous Prefecture, Yunnan Province
21-1B	Wuchashu, Laowo Township, Lushui County, Nujiang Lisu Autonomous Prefecture, Yunnan Province
21-2B	Wuchashu, Laowo Township, Lushui County, Nujiang Lisu Autonomous Prefecture, Yunnan Province
21-3B	Wuchashu, Laowo Township, Lushui County, Nujiang Lisu Autonomous Prefecture, Yunnan Province
22-1B	Pingyuan Street, Yanshan County, Wenshan Zhuang and Miao Autonomous Prefecture, Yunnan Province
22-2B	Pingyuan Street, Yanshan County, Wenshan Zhuang and Miao Autonomous Prefecture, Yunnan Province
22-3B	Pingyuan Street, Yanshan County, Wenshan Zhuang and Miao Autonomous Prefecture, Yunnan Province
23B	Puxiong Township, Honghe County, Honghe Hani and Yi Autonomous Prefecture, Yunnan Province
24B	Limin Township, Honghe County, Honghe Hani and Yi Autonomous Prefecture, Yunnan Province
25-1B	Fengjia Town, Qianjiang District, Chongqing
25-2B	Fengjia Town, Qianjiang District, Chongqing
25-3A	Fengjia Town, Qianjiang District, Chongqing
26B	Honghe County, Honghe Hani and Yi Autonomous Prefecture, Yunnan Provinc
28-1B	Longli County, Qiannan Buyi and Miao Autonomous Prefecture, Guizhou Province
28-2B	Longli County, Qiannan Buyi and Miao Autonomous Prefecture, Guizhou Province
28-3B	Longli County, Qiannan Buyi and Miao Autonomous Prefecture, Guizhou Province
29B	Xiao Hai Town, Weining County, Bijie City, Guizhou Province (grown at home)
30B	Shuitang Township, Hezhang County, Bijie City, Guizhou Province
31B	Chuanyan Village, Yangchang Town, Dafang County, Bijie City, Guizhou Province
33-1A	Kaili City, Guizhou Province
33-2B	Kaili City, Guizhou Province
33-3B	Kaili City, Guizhou Province
34-1A	Machang Town, Pingba County, Anshun City, Guizhou Province
34-2B	Machang Town, Pingba County, Anshun City, Guizhou Province
34-3A	Machang Town, Pingba County, Anshun City, Guizhou Province
35A	Guiguo Township, Zhijin County, Bijie City, Guizhou Province
39-1A	Danzhai, Qiandongnan Miao and Dong Autonomous Prefecture, Guizhou
40-1B	Aba Tibetan and Qiang Autonomous Prefecture, Sichuan Province
1-1A	New Cultivar
1-2A	New Cultivar
1-3A	New Cultivar
2-1A	New Cultivar
2-2A	New Cultivar
2-3A	New Cultivar
3-1A	New Cultivar
3-2A	New Cultivar
3-3A	New Cultivar
4-1A	New Cultivar
4-2A	New Cultivar
4-3A	New Cultivar

## Sheet: Table S2
HiFi Sequencing Data Statistics								HiFi Sequencing Data Statistics
Total bases (Gb)	Total reads	Average Length (bp)	Max Length	N50 Length (bp)				Total bases (Gb)	Total reads	Average Length (bp)	Max Length	N50 Length (bp)
18.15	1621839	11118	40528	11.175				18.15	1621839	11118	40528	11.175

## Sheet: Table S3
HiFi Assembly Results Statistics
		Contig
	Length(bp)		Number
Max length	12946077		-
N50	2473676		120
N60	1999427		164
N70	1565728		219
N80	1135939		293
N90	735202		397
Total length	974671610		-
Number>=2Kb	-		736
Number>=1Mbp	-		322
GC rate		0.42

## Sheet: Table S4
Hi-C Sequencing Data Statistics
	Clean Base(bp)	Q20(%)	Q30(%)	GC Content(%)
	142773104620	97.72	93.67	43.9
Total	142773104620

## Sheet: Table S5
Juicer results statistics
	Number of Reads Pair	Ratio
Sequenced Read Pairs	460558402	1
Normal Paired	155779926	0.3382
Chimeric Paired	72855053	0.1582
Chimeric Ambiguous	227314704	0.4936
Unmapped	4608722	0.01
Ligation Motif Present	393528127	0.8545
Alignable (Normal+Chimeric Paired)	228634979	0.4964
Unique Reads	212303329	0.461
PCR Duplicates	16331650	0.0355
Optical Duplicates	0	0
Hi-C Contacts	68756256	0.1493

## Sheet: Table S6
Genome Assembly Results Statistics
	scaffold		contig
	length(bp)	number	length(bp)	number
max_len	136321016		12946077
N10	136321016	1	5951645	13
N20	131705231	2	4604180	33
N30	127193795	3	3838260	56
N40	127193795	3	2991275	85
N50	126755541	4	2434048	121
N60	122201038	5	1987531	166
N70	112669163	6	1546167	222
N80	107124605	7	1113206	298
N90	103520891	8	728355	404
Total_length	975006610		974671610
number>=100bp	86		756
number>=2000bp	86		756
number>=1Mb	9		322
GC_rate	0.42		0.42

## Sheet: Table S7
Length of Each Chromosome in the Genome
Super-Scaffold ID	Length(bp)
Chr01	136321016
Chr02	131705231
Chr03	127193795
Chr04	126755541
Chr05	122201038
Chr06	112669163
Chr07	107124605
Chr08	103520891

## Sheet: Table S8
The BUSCO assessment results of the contig and chromosome
Type	Number	Match percentage of Contig	Number	Match percentage of Chromosome
Complete BUSCOs (C)	1528	94.67	1527	94.61
Complete and single-copy BUSCOs (S)	1372	85.01	1374	85.13
Complete and duplicated BUSCOs (D)	156	9.67	153	9.48
Fragmented BUSCOs (F)	19	1.18	20	1.24
Missing BUSCOs (M)	67	4.15	67	4.15
Total BUSCO groups searched	1614		1614
The BUSCO assessment results of the gene set.
Type	Number	Match percentage of Contig
Complete BUSCOs (C)	1523	94.4
Complete and single-copy BUSCOs (S)	1275	79
Complete and duplicated BUSCOs (D)	248	15.4
Fragmented BUSCOs (F)	17	1.1
Missing BUSCOs (M)	74	4.5
Total BUSCO groups searched	1614

## Sheet: Table S9
Repeat Sequence Annotation Results
Total Genome Length = 974671610
Type	Repeat Size	% of genome
Trf	42967840	4.40844
Repeatmasker	150124341	15.4026
Proteinmask	192345881	19.7344
De novo	566855338	58.1586
Total	626385535	64.2663
De novo
Type	Length (Bp)	% in genome
DNA	6181812	0.634246
LINE	10171706	1.0436
SINE	32559	0.003341
LTR	551121715	56.5443
Other	0	0
Satellite	133730	0.013721
Simple_repeat	105760	0.010851
Unknown	338623	0.034742
Total	566855338	58.1586
	Repbase TEs		TE protiens		De novo		Combined TEs
Type	Length (Bp)	% in genome	Length (Bp)	% in genome	Length (Bp)	% in genome	Length (Bp)	% in genome
DNA	5371574	0.551116	595911	0.06114	6181812	0.634246	11280757	1.15739
LINE	10288745	1.05561	30133996	3.09171	10171706	1.0436	41185485	4.22558
SINE	140248	0.014389	0	0	32559	0.003341	172807	0.01773
LTR	134686269	13.8186	161622409	16.5822	551121715	56.5443	565621687	58.032
Other	251	2.6e-05	0	0	0	0	251	2.6e-05
Unknown	0	0	0	0	338623	0.034742	338623	0.034742
Total	150124341	15.4026	192345881	19.7344	566615848	58.134	608851959	62.4674

## Sheet: Table S10
Gene structure and ncRNA annotation statistics
	Gene set	Number	Average gene lenth (bp)	Average CDS length(bp)	Average exon per gene	Average exon length(bp)	Average intron length(bp)
De novo	AUGSTUTUS	100738	1881	884	4.2	210	311
Homolog	A. thaliana	84246	2478	907	3.5	256	618
	B. vulgaris	85005	2604	847	3.1	271	825
	F. tataricum	320159	1846	661	2.4	275	844
	S. tuberosum	136531	2066	741	2.6	281	811
Integration	Maker	40610	2319	1176	4.9	241	292
ncRNA Annotation Results
Type		Copy(w)	Average length(bp)	Total length(bp)	% of genome
miRNA		96	118.792	11404	0.00117
tRNA		1141	75.752	86433	0.008868
rRNA	rRNA	3244	199.31	646561	0.066336
	18S	202	1322.54	267154	0.02741
	28S	578	141.789	81954	0.008408
	5.8S	151	152.815	23075	0.002367
	5S	2313	118.624	274378	0.028151
snRNA	snRNA	807	126.112	101772	0.010442
	CD-box	436	105.381	45946	0.004714
	HACA-box	56	130.893	7330	0.000752
	splicing	315	153.956	48496	0.004976

[truncated: 5 more sheets: Table S11, Table S12, Table S13, Table S14, Table S15]
